# Supplementary material for: Injectable, shear-thinning, photocrosslinkable, and tissue-adhesive hydrogels composed of diazirine-modified hyaluronan and dendritic polyethyleneimine
Source: Royal Society of Chemistry journal article supplement (doi:10.1039/d3bm01279d), 2024-01-01
Supplement: d3bm01279d1.pdf [file d3bm01279d1.pdf]

### Supplementary Information

#### **Injectable, shear-thinning, photocrosslinkable, and tissue-adhesive hydrogels composed of diazirine-modified hyaluronan and dendritic polyethyleneimine**

Arvind K. Singh Chandel<sup>1</sup>, Athira Sreedevi Madhavikutty<sup>1</sup>, Saki Okada<sup>1</sup>, Zhang Qi Ming<sup>1</sup>, Natsuko F. Inagaki<sup>1</sup>, Seiichi Ohta<sup>1,2</sup> and Taichi Ito\*<sup>1,2,3</sup>

<sup>1</sup>Department of Chemical System Engineering, School of Engineering,

<sup>2</sup>Department of Bioengineering, School of Engineering,

<sup>3</sup>Radiology and Biomedical Engineering, School of Medicine,

The University of Tokyo, 7-3-1 Hongo, Bunkyo-ku, Tokyo 113-8656, Japan

#### **Corresponding author**

Taichi Ito, Ph.D.

Center for Disease Biology and Integrative Medicine Faculty of Medicine,

Department of Chemical System Engineering, School of Engineering,

Department of Bioengineering, School of Engineering,

The University of Tokyo

Address: 7-3-1 Hongo, Bunkyo-ku, Tokyo 113-0033, JAPAN

E-mail: [taichi@m.u-tokyo.ac.jp](mailto:taichi@m.u-tokyo.ac.jp)

## Supplementary Information

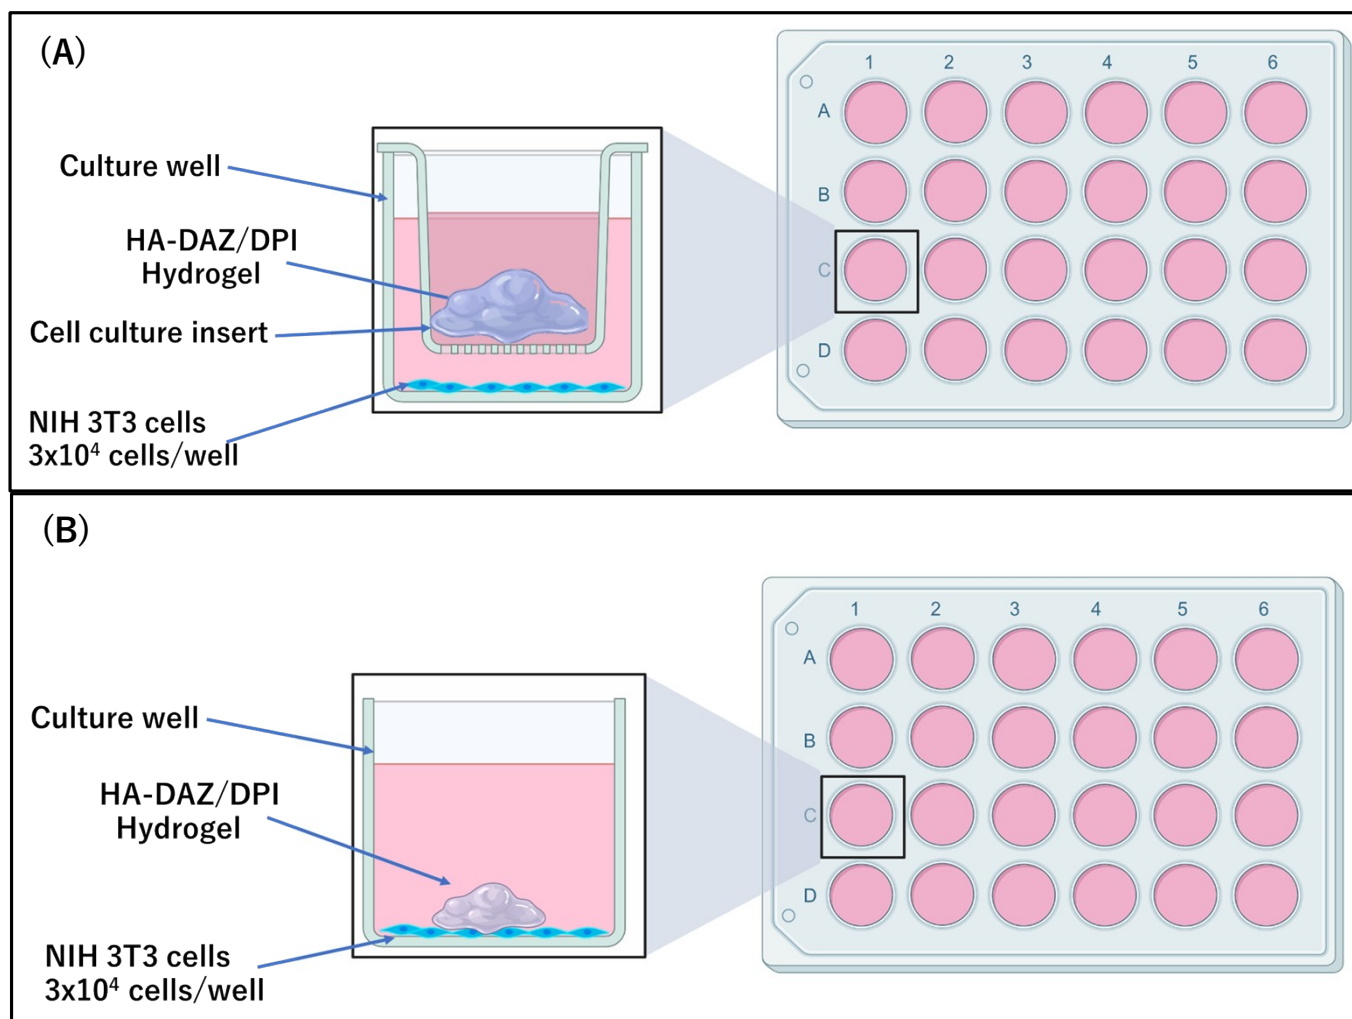

**Fig. S1.** Schematic illustration of the cytocompatibility experiment. Shown are (A) separation of the hydrogel and cells using a cell culture insert and (B) direct placement of the hydrogel on cells.

### Supplementary Information

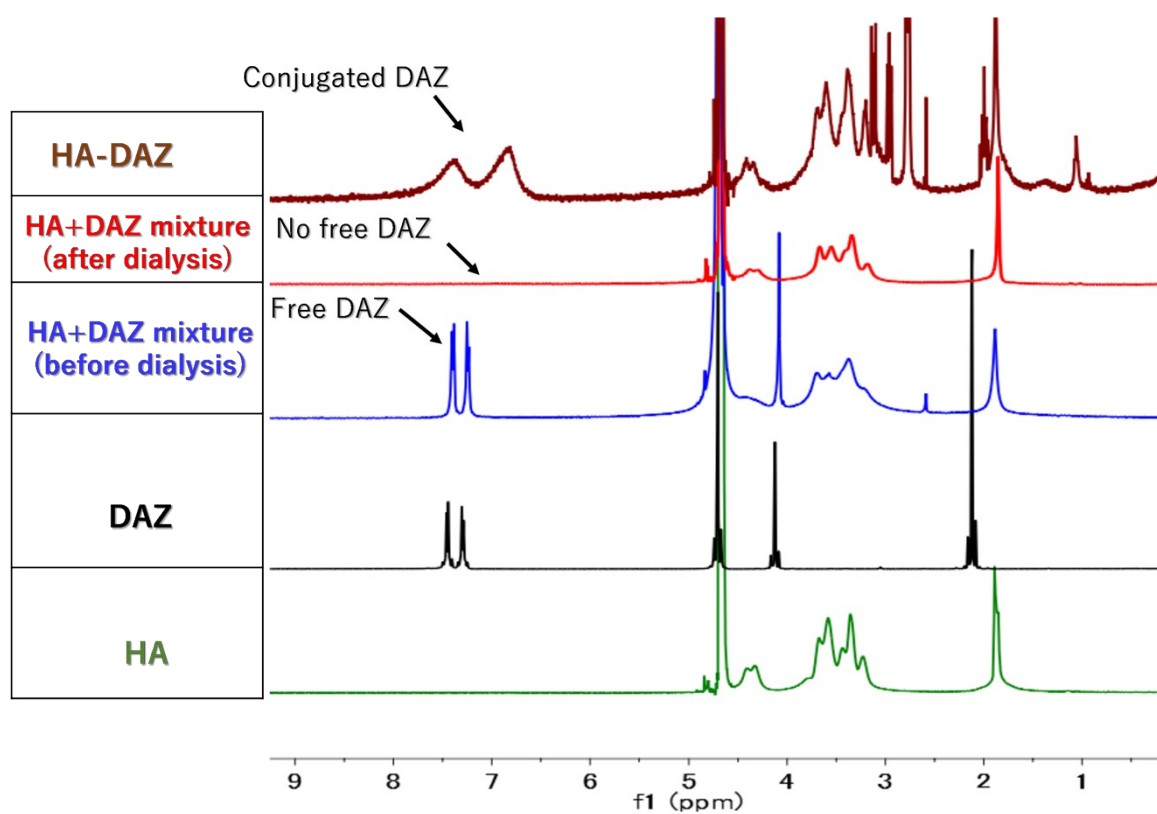

**Fig. S2** <sup>1</sup>H NMR spectra of the HA and DAZ mixture before and after dialysis. Peaks associated with DAZ disappeared after the dialysis, indicating successful purification.

### Supplementary Information

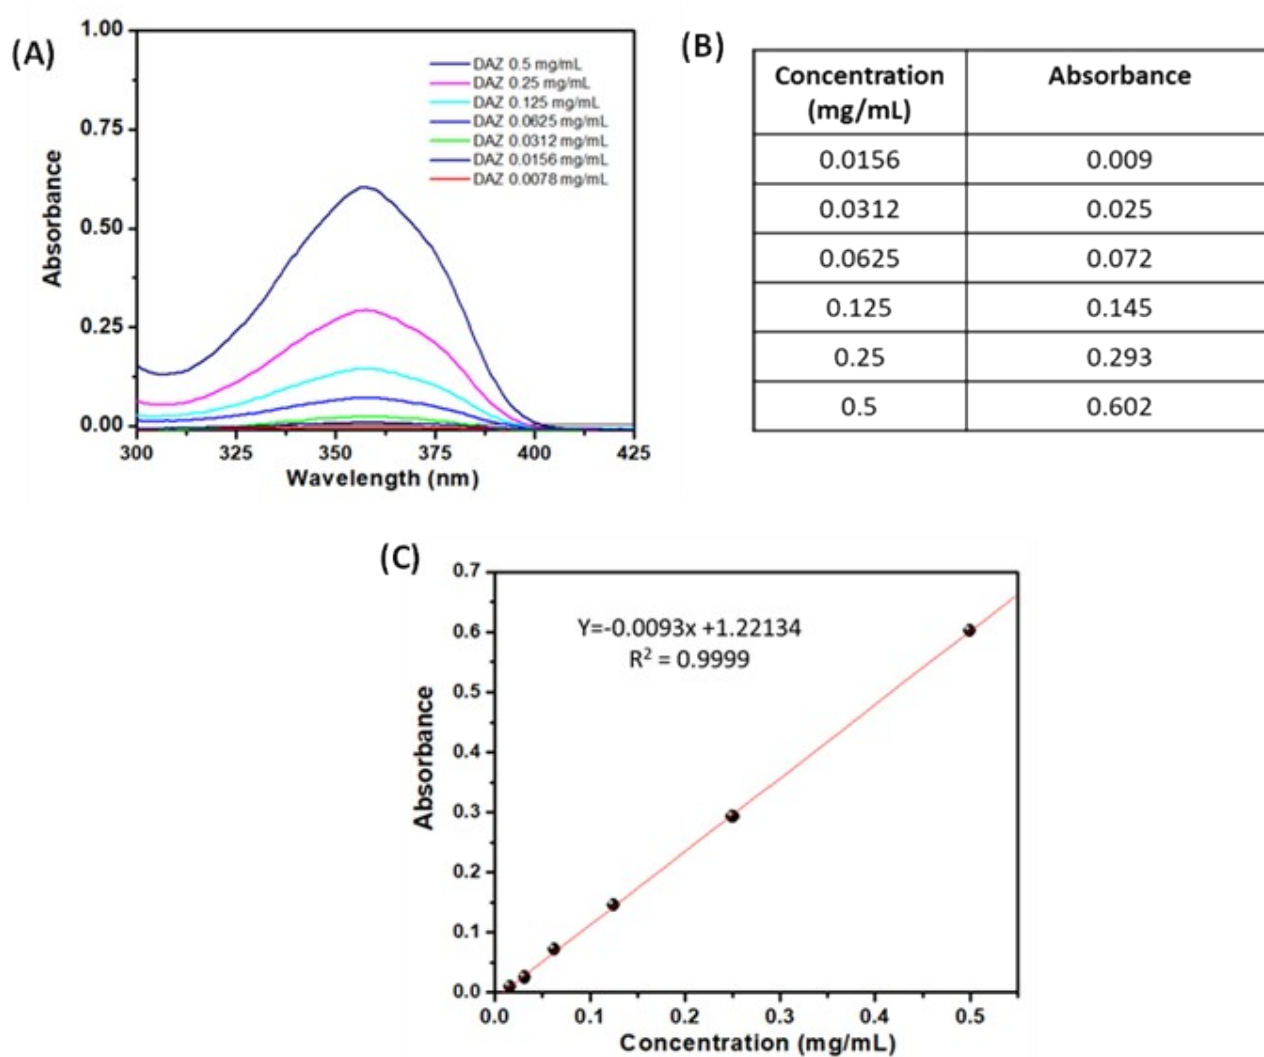

**Fig. S3.** (A) UV-vis spectra and (B) absorbance value at 348 nm of diazirine of the different concentrations in DMSO. (C) Calibration line between absorbance at 348 nm and diazirine concentration.

Supplementary Information

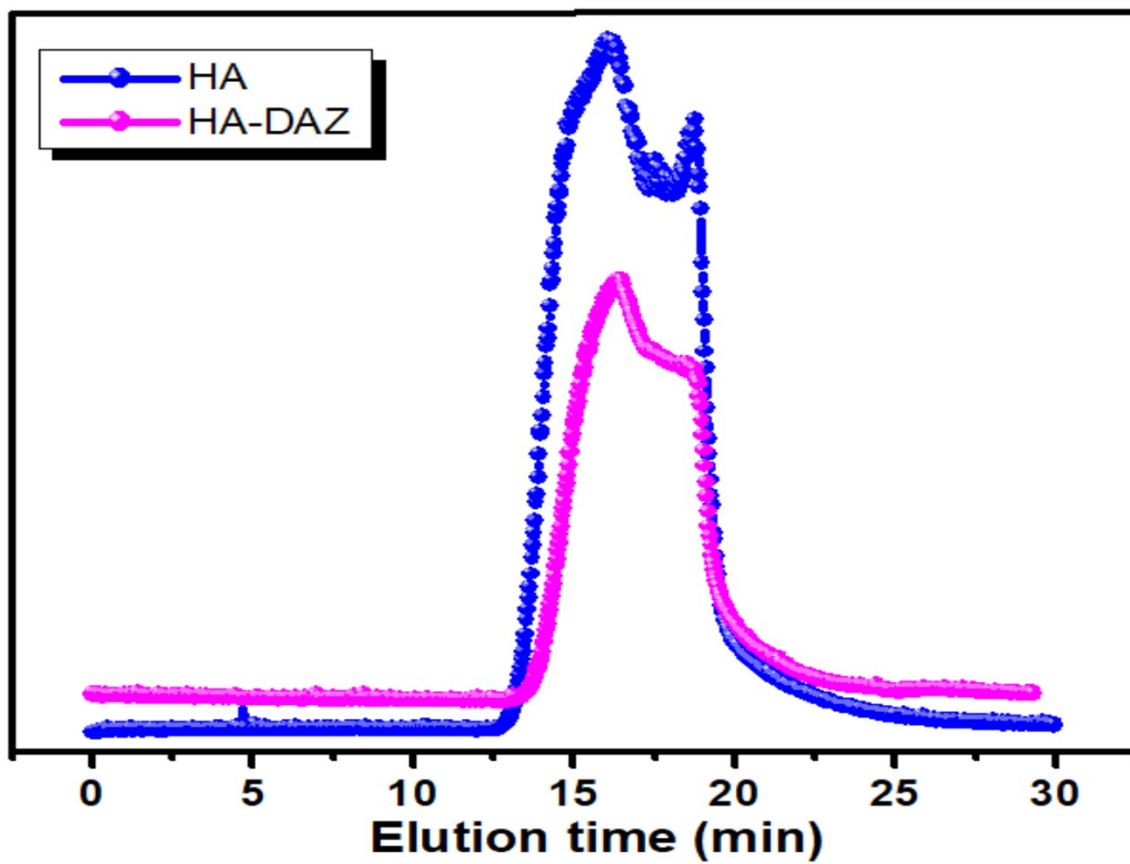

Fig. S4. GPC elution curves for HA and HA-DAZ

## Supplementary Information

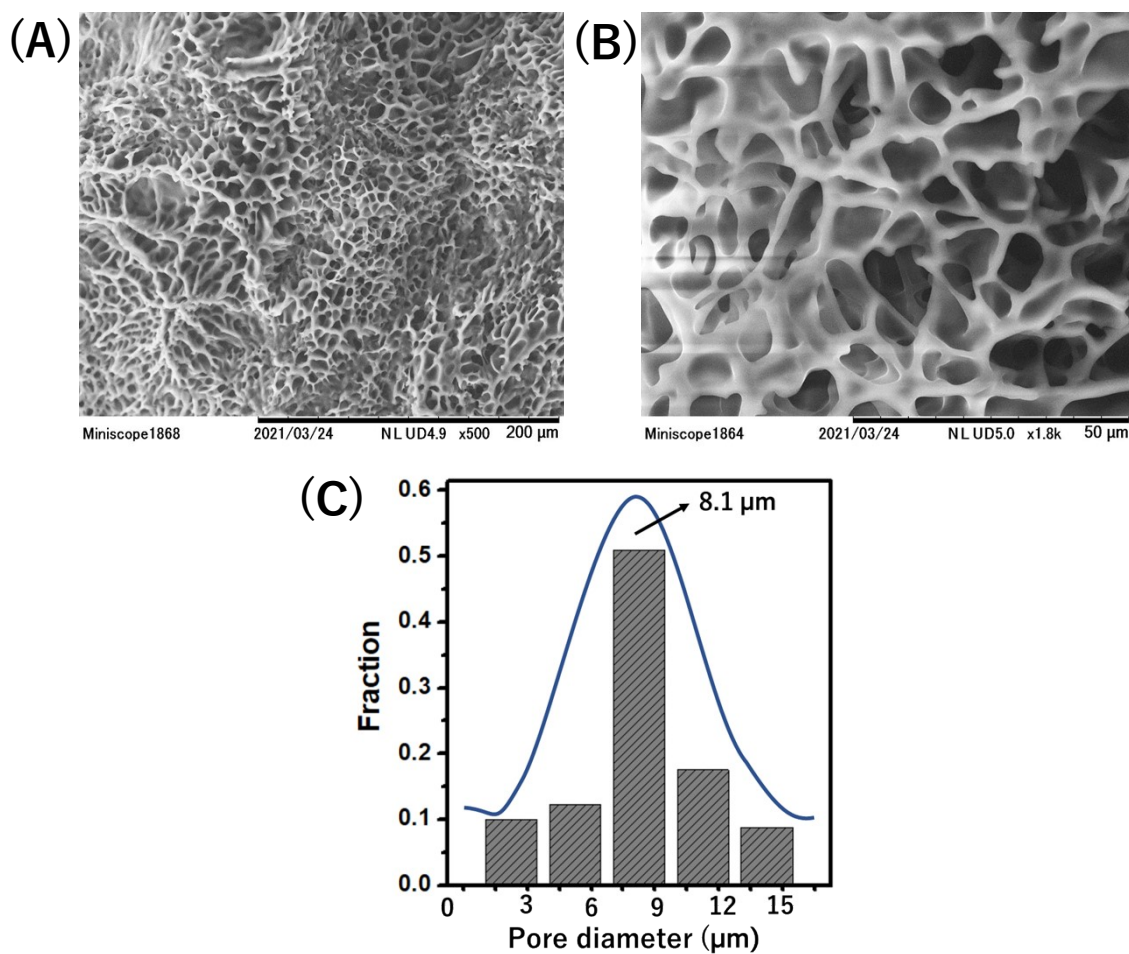

**Fig. S5.** Pore-size estimation of the photo-crosslinked HA-DAZ hydrogels. (A-B) show cross-sections of the HA-DAZ/DPI hydrogel and (C) shows the pore-size distribution of the DAZ/DPI crosslinked hydrogel. The average pore size of the photocrosslinked HA-DAZ/DPI hydrogel was calculated using SEM images.

## Supplementary Information

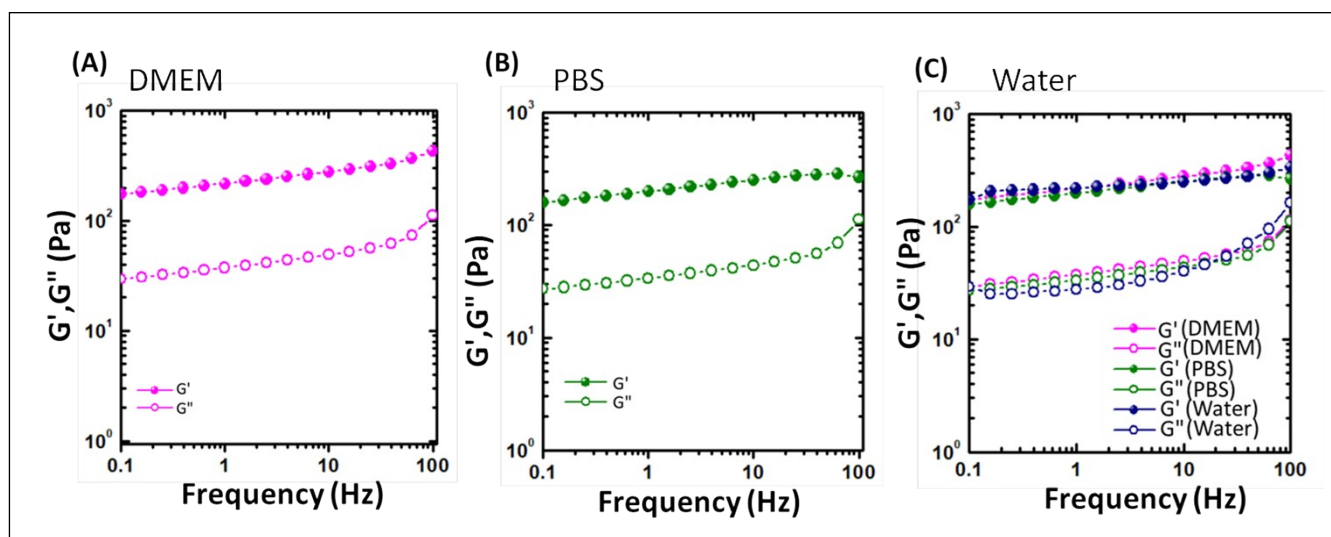

**Fig. S6.** Frequency sweep test of HA-DAZ/DPI hydrogels prepared with (A) DMEM and (B) PBS (adjusted to pH 7.4). Data for HA-DAZ/DPI hydrogels prepared with water (described in the main text) is also shown in (C) Water for comparison.

Supplementary Information

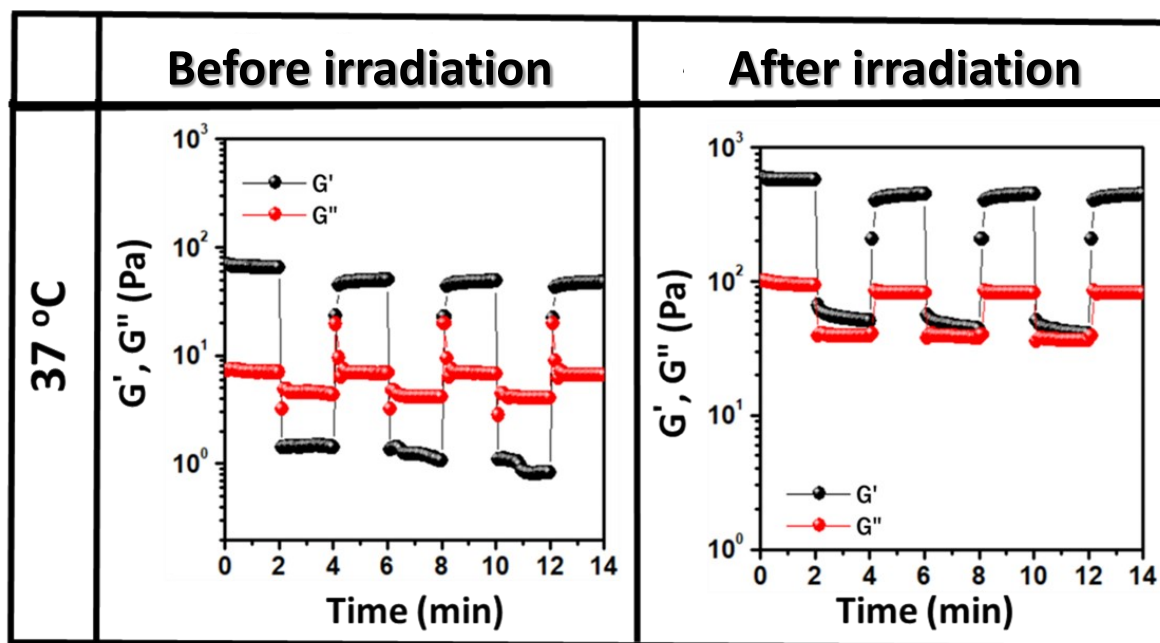

**Fig. S7.** Self-healing properties of HA-DAZ/DPI as examined by alternative strain sweep before and after photocrosslinking at 37°C



## Supplementary Information

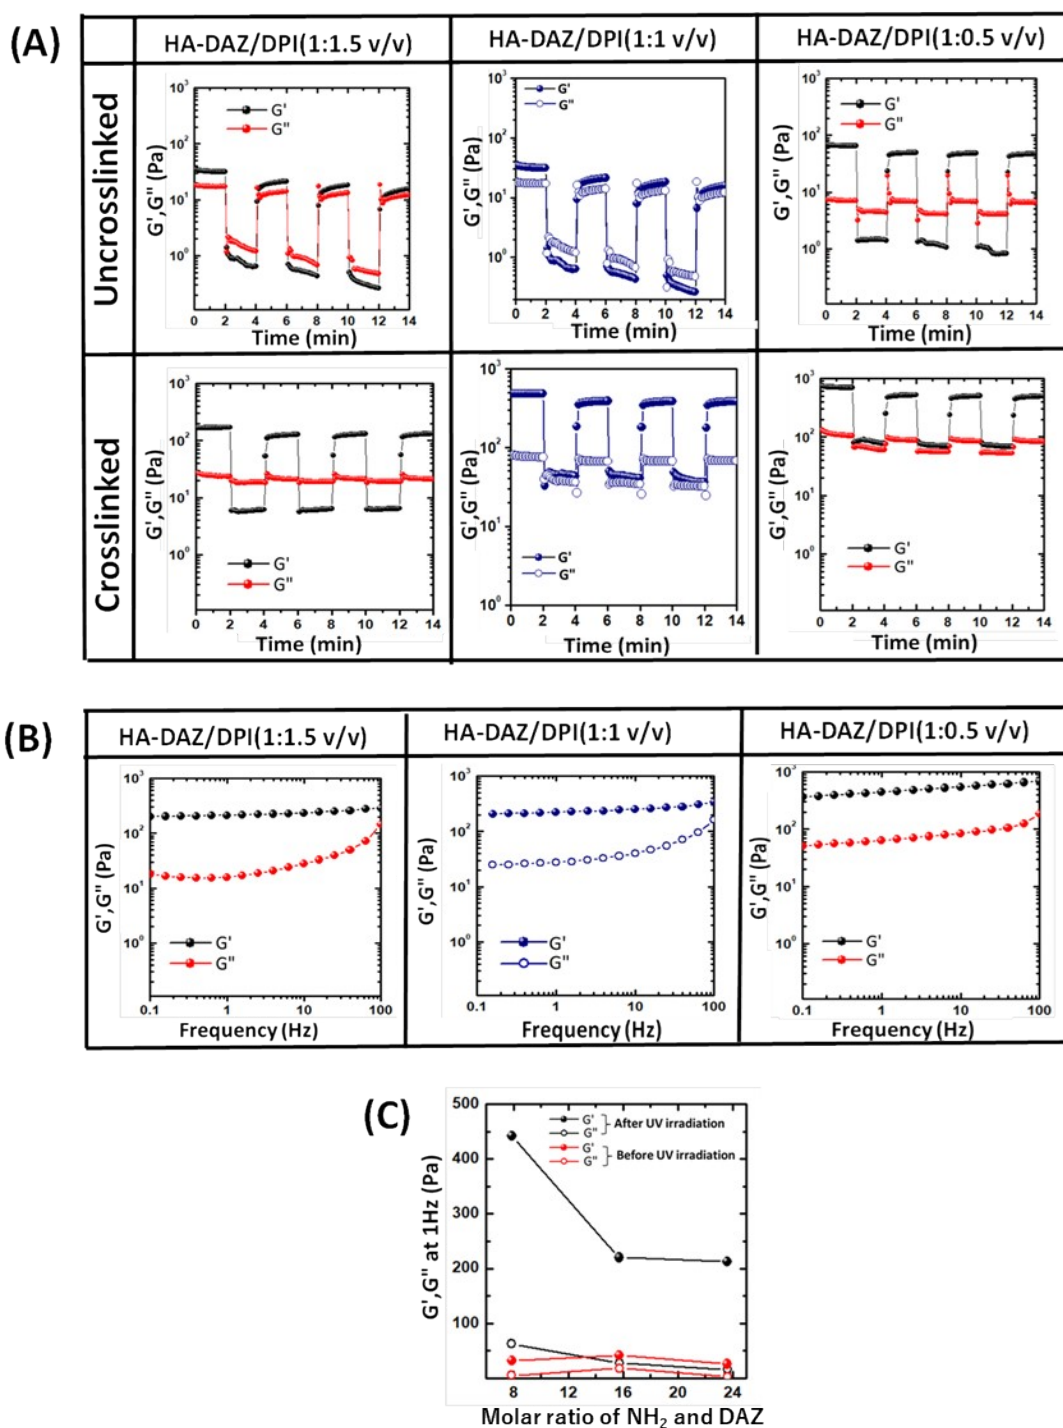

**Fig. S8.** Alternative strain sweep test and frequency sweep test of HA-DAZ/DPI hydrogels prepared using three different mixing volume ratios of HA-DAZ solution to DPI solution (i.e., 1.0:1.5, 1.0:1.0, and 1.0:0.5 vol/vol). The concentrations of the HA-DAZ and DPI precursor polymer solutions were 1.0 and 3.3 wt%, respectively. (A) Time course of  $G'$  and  $G''$  of uncrosslinked and crosslinked HA-DAZ/DPI with alternative strain sweep (B) Dependency of  $G'$  and  $G''$  on frequency of crosslinked HA-DAZ/DPI. (C) The relationship between the molar ratios of  $\text{NH}_2$  of DPI to DAZ of HA-DAZ and  $G'$  and  $G''$  at a frequency of 1 Hz shown in (B).

### Supplementary Information

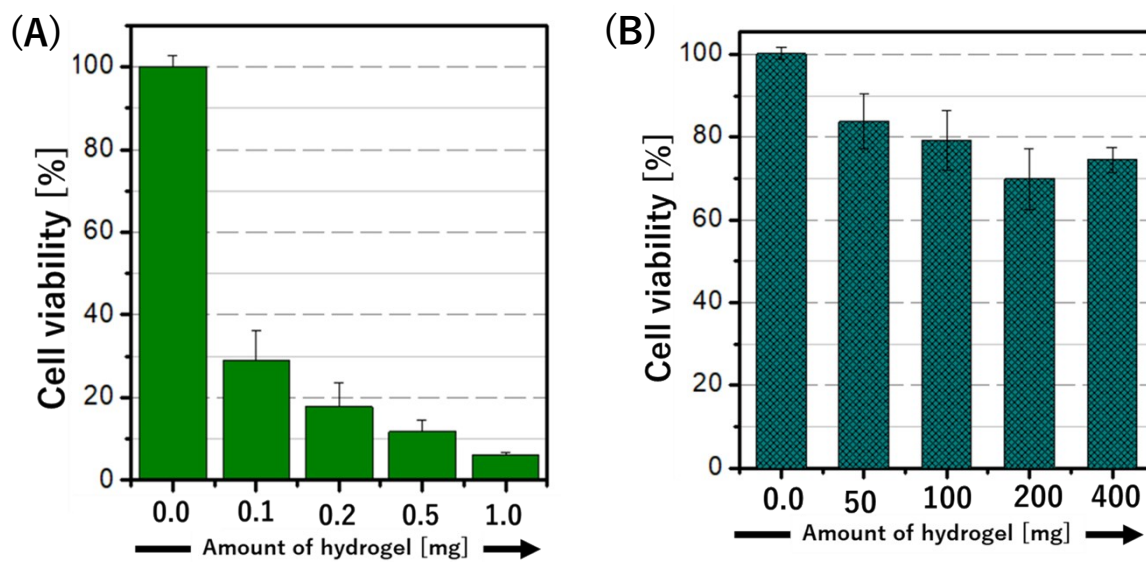

**Fig. S9.** (A) Cell viability of NIH-3T3 cells incubated with different concentrations of DPI for 48h. (B) Cell viability of NIH3T3 cells in direct contact with different amounts of HA-DAZ/DPI hydrogels.

## Supplementary Information

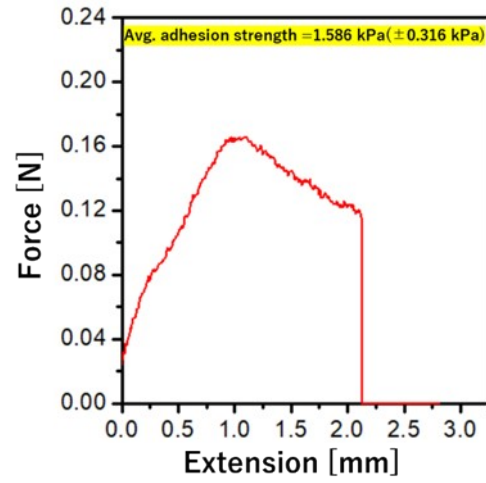

**Fig. S10.** The lap-shear adhesion test between the HA-DAZ solution after photocrosslinking and porcine esophagus mucosa samples.

## Supplementary Information

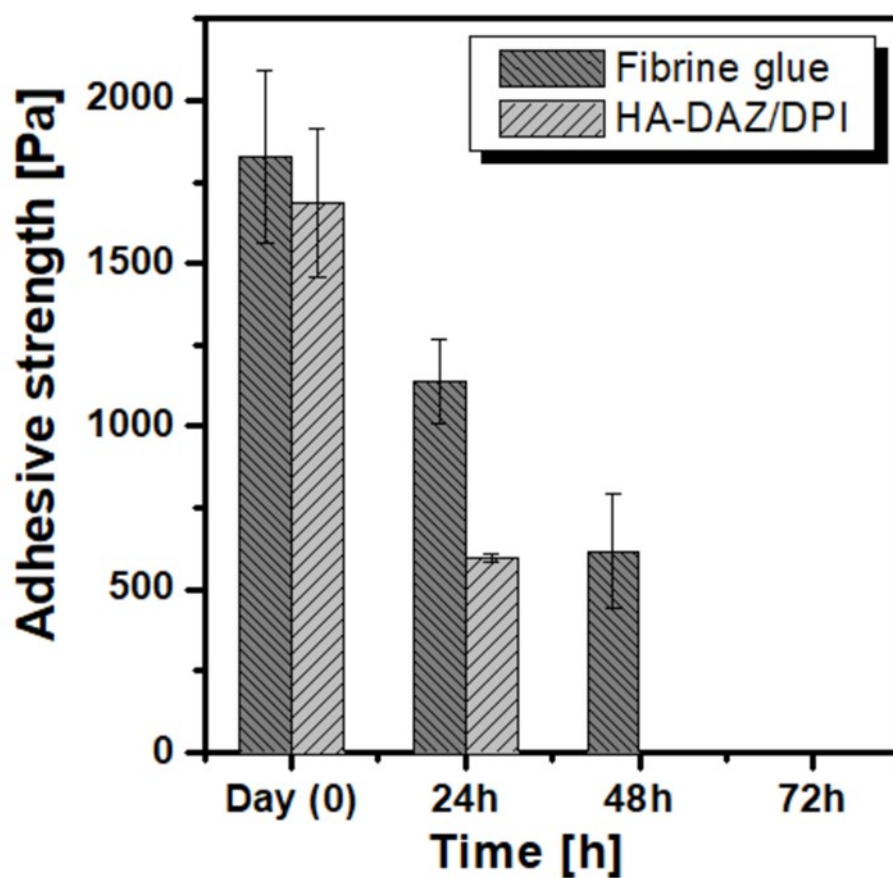

**Fig. S11** The time-dependent adhesion strength of HA-DAZ/DPI hydrogel and fibrin glue using porcine esophageal mucosa as a substrate under immersion in phosphate buffer solution. A lap-shear test was performed to measure the adhesion strength at each incubation time point after adhesion of the materials to the mucosa.

## Supplementary Information

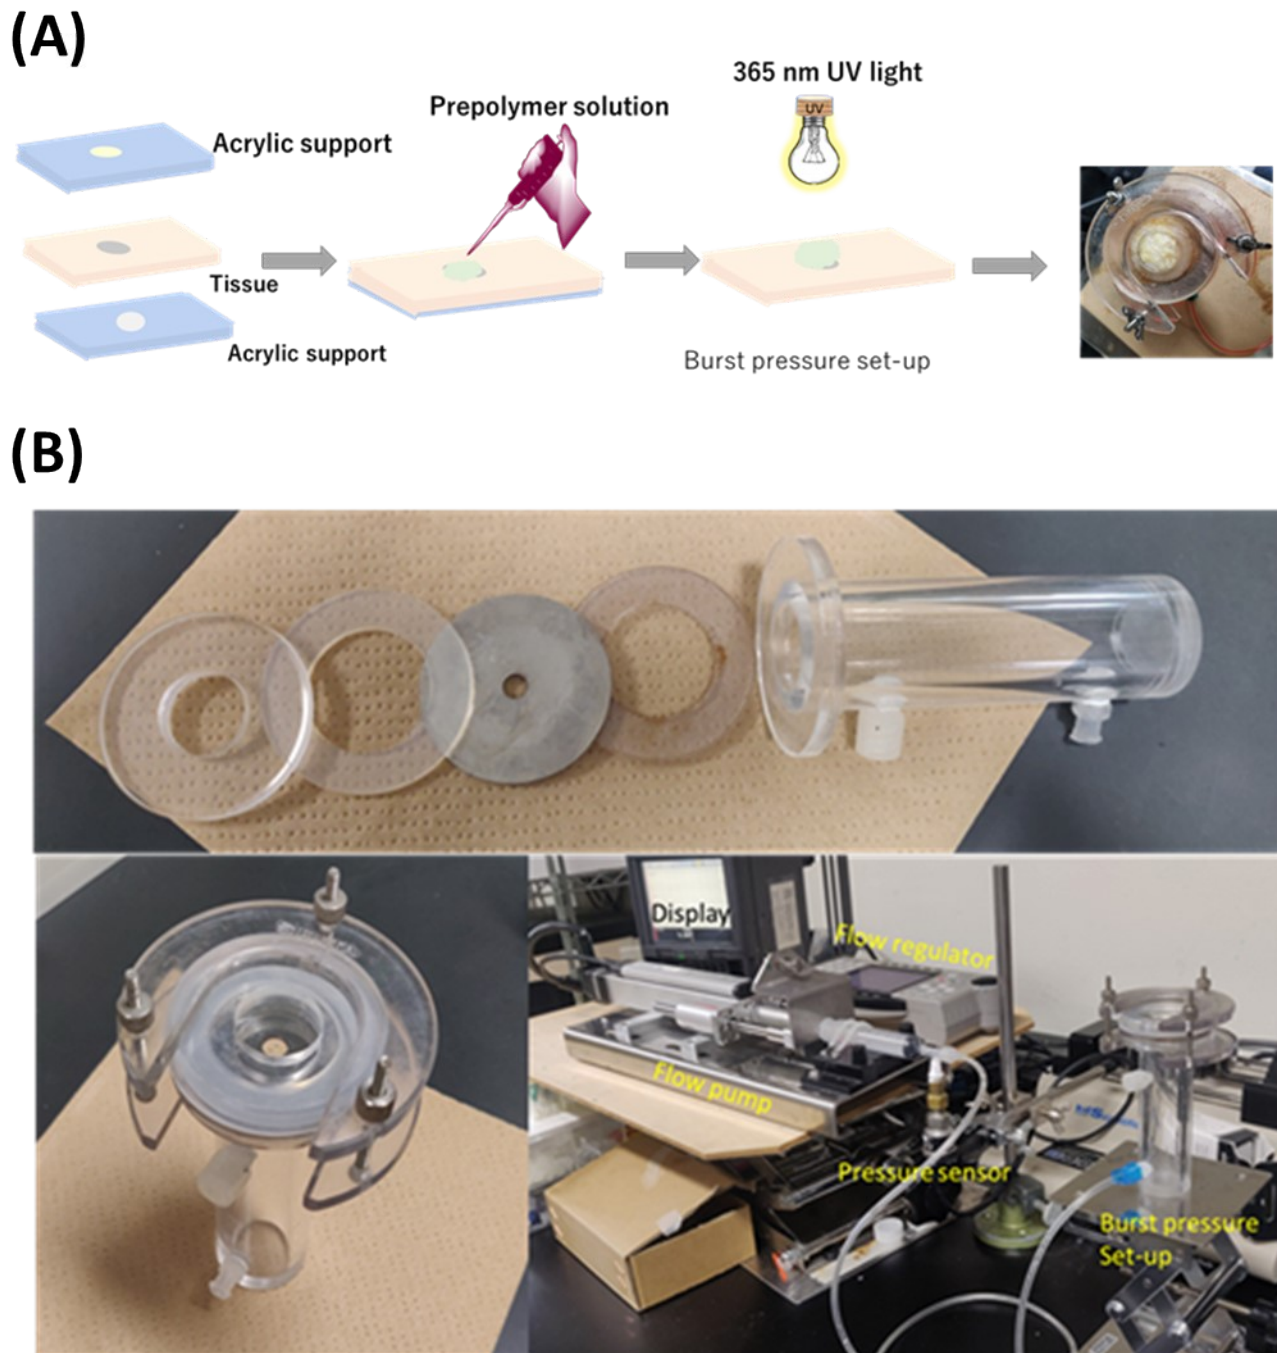

**Fig. S12.** (A) Experimental procedure and apparatus used for the burst pressure test using porcine esophagus mucosa. The upper panel shows a schematic illustration, while the lower panel shows (B) images of the actual custom-designed and fabricated burst pressure setup.

## Supplementary Information

**Table S1:** Comparison of exposed UV light intensity, exposure duration, and adhesion strength of previously reported diazine-based hydrogels.

| Polymer                                  | UV Power<br>mW/cm <sup>-2</sup> . | Exposure<br>Time | Adhesion<br>Substrate             | Adhesion<br>strength | Reference                                                                                |
|------------------------------------------|-----------------------------------|------------------|-----------------------------------|----------------------|------------------------------------------------------------------------------------------|
| PLGA-g-diazirine                         | 0.5                               | 10 min           | Porcine aorta                     | 4.5 kPa              | Terry W. J. Steele<br>Macromolecular Bioscience,<br>14(4), pp.478-484.                   |
| (PAMAM-g-diazirine)                      | 21.3                              | 5 min            | Cardiovascular<br>tissue          | 40 kPa               | Terry W. J. Steele<br>Macromolecular bioscience 16,<br>no. 7 (2016): 1072-1082           |
| PAMAM-g-diazirine                        | 100.0                             |                  | Collagen film                     | 40 kPa               | Terry W. J. Steele<br>Biomacromolecules, 2018<br>19(5), 1425-1434.                       |
| PHEMA-diazirine                          | 17.3                              | 3 min            | Bovine meniscus<br>tissue         | 38 kPa               | Terry W. J. Steele, and Harm-<br>Anton Klok<br>Biomacromolecules 2020, 21,<br>1, 240–249 |
| PAMAM-g-diazirine                        | 6.0                               | 5 min            | Porcine aorta                     | 25 kPa               | Junying Zhang and Terry W. J.<br>Steele Molecules, 23(4), 796                            |
| CEC-diazirine                            | 6.0                               | 2 h              | -                                 | -                    | Jin Kim Montclare<br>Biomacromolecules 2021, 21,<br>9, 3608–3619                         |
| Benzophenone<br>methacrylamide<br>(BPMA) | 18.0                              | 1 h              | -                                 | -                    | Amy E. Herr Analyst,<br>2021,146, 6621-6630                                              |
| PAMAM-g-diazirine                        | 8.0                               | 2 h              | -                                 | -                    | Jin Kim Montclare<br>Biomacromolecules 2021, 22,<br>4, 1509–1522                         |
| HA-diazirine                             | 6.0                               | 5 min            | Porcine<br>esophagus<br>submucosa | 2.7kPa               | This paper                                                                               |

**PLGA** = poly(lactic-co-glycolic acid), **PAMAM** = polyamidoamine, **PHEMA** = Poly 2-hydroxyethyl methacrylate, **CEC** = Chromo domain-containing protein.
